# Supplementary material for: Effects of Training Status and Exercise Mode on Global Gene Expression in Skeletal Muscle
Source: MDPI journal article supplement (doi:10.3390/ijms222212578), 2021-11-22
Supplement: s1 [file s1]

**Table S1. Number of genes differentially expressed between 30' Post and 3h Post in the respective training groups.**

| Comparison            | Group | # per group | Up  | Down | Total |
|-----------------------|-------|-------------|-----|------|-------|
| 30' Post vs 180' Post | ET    | 8           | 107 | 65   | 172   |
| 30' Post vs 180' Post | E-UT  | 8           | 24  | 127  | 151   |
| 30' Post vs 180' Post | ST    | 8           | 92  | 99   | 191   |
| 30' Post vs 180' Post | S-UT  | 8           | 27  | 94   | 121   |

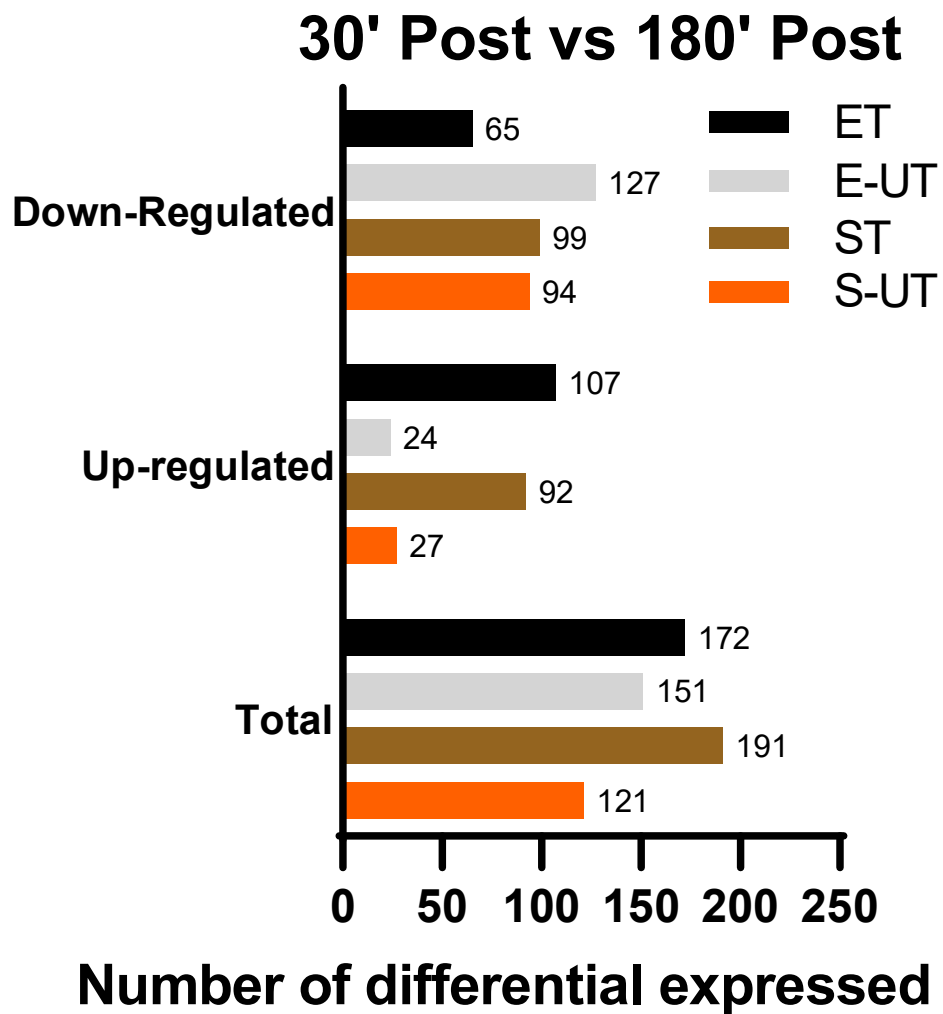

**Figure S1: Number of differentially expressed genes in response to the exercise test (endurance or strength) 30' Post vs 180' Post.** The total number of differentially expressed genes in skeletal muscle of endurance or strength trained (ET and ST) and untrained (E-UT and S-UT) participants is lower compared to Pre vs 30' Post or to Pre vs. 180' Post. While ST, S-UT and E-UT showed more down-regulation, ET was the only group where more up- than downregulation was observed.

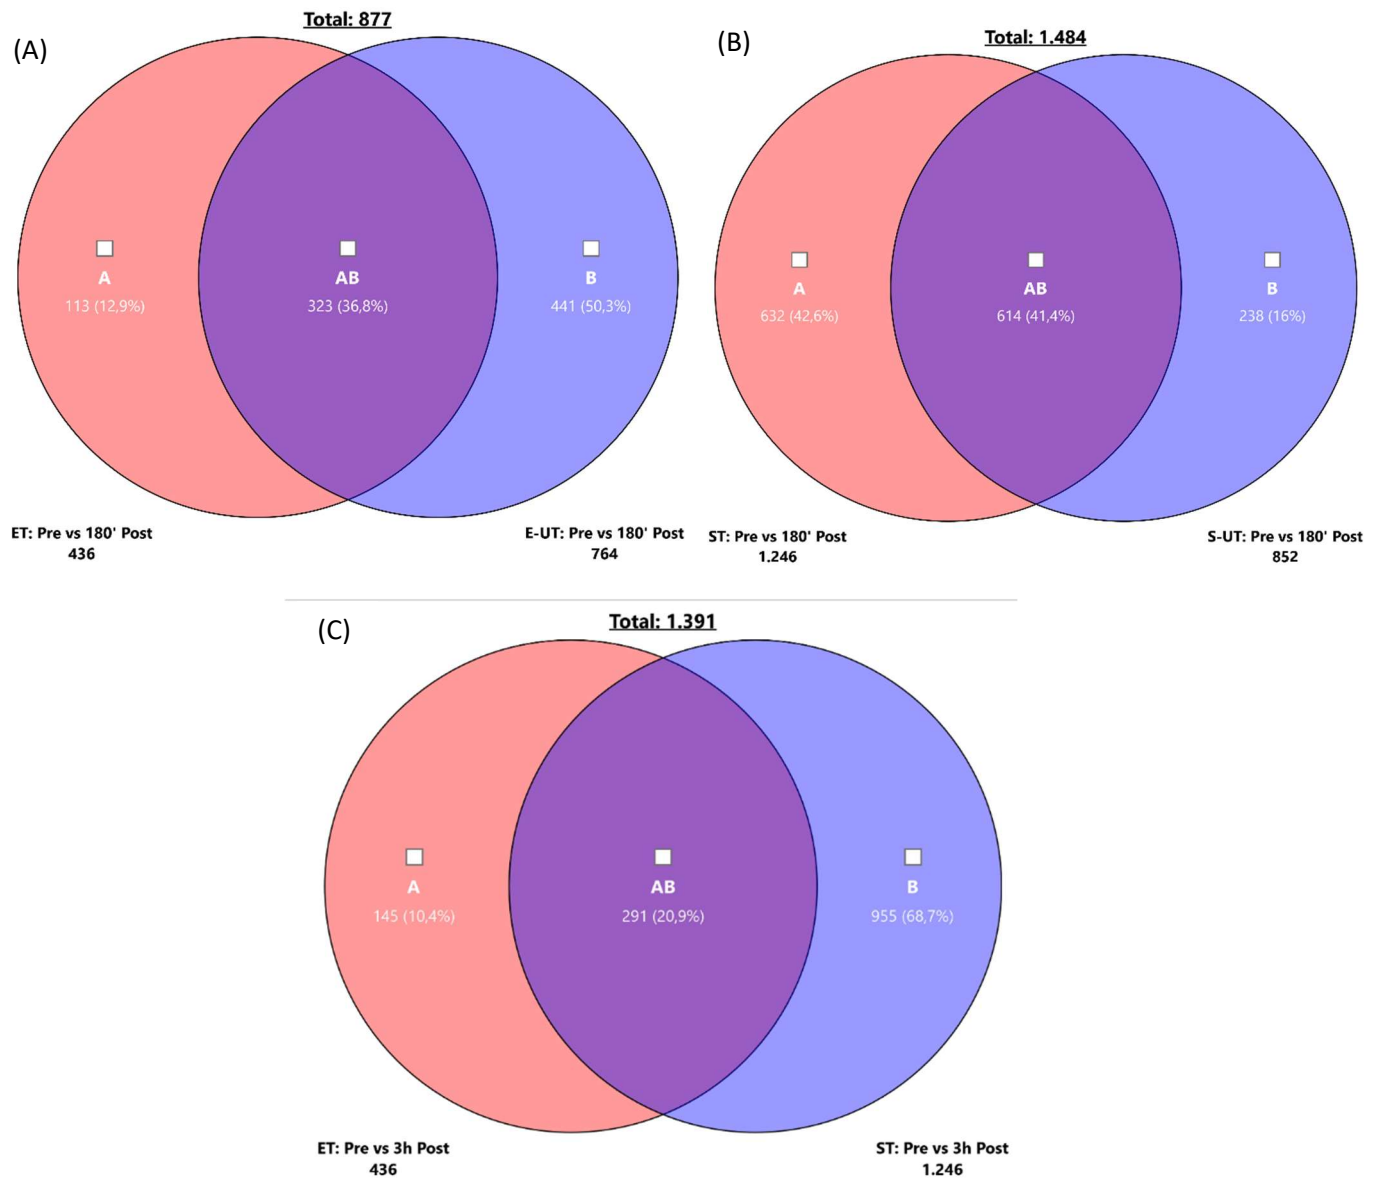

**Figure S2: Venn diagrams of (A) ET vs E-UT, (B) ST vs S-UT and (C) ET vs ST regarding differentially expressed genes Pre vs 180' Post.** The highest overlap (41.4%) as well as highest total number of differentially expressed genes (1,484 genes) was observed ST vs S-UT (B). The lowest total number was seen ET vs E-UT (877 genes, (A)), while the overlap percentage of ET and ST was only 20.9% (C).
