# Supplementary material for: Effects of Training Status and Exercise Mode on Global Gene Expression in Skeletal Muscle
Source: Int J Mol Sci. 2021 Nov 22;22(22):12578. doi: 10.3390/ijms222212578 (PMC8674764; doi:10.3390/ijms222212578)
Supplement: Supplementary file 1 [file ijms-22-12578-s001.zip › Supplemental S1.xlsx]

## Sheet: ET vs E-UT at PRE
Top 20 genes with highest fold change between ET and E-UT at basal time point PRE
#%result_name=BAM Threshold 1,5 Basal
#%array_type=HG-U219
#%annotation=HG-U219.na36.annot.csv
#%comparison=Pre: ET vs E-UT
ID	Pre: ET Avg (log2)	Pre: E-UT Avg (log2)	Fold Change	P-val	FDR P-val	Gene Symbol	Description	E12R001a05.rma.chp Signal	E12R001b05.rma.chp Signal	E12R001c01.rma.chp Signal	E12R001c05.rma.chp Signal	E12R001d01.rma.chp Signal	E12R001e05.rma.chp Signal	E12R001h01.rma.chp Signal	E12R001i05.rma.chp Signal	E12R001j01.rma.chp Signal	E12R001j05.rma.chp Signal	E12R001m01.rma.chp Signal	E12R001o01.rma.chp Signal	E12R001p01.rma.chp Signal	E12R001q01.rma.chp Signal	E12R001s04.rma.chp Signal	E12R001u01.rma.chp Signal
11730995_a_at	6.45	9.81	-10.27	0.0126	0.4873	ACTN3	actinin, alpha 3 (gene/pseudogene)	9.87	3.9	7.99	9.73	8.7	8.72	3.31	6.07	6.29	7.77	8.28	4.9	10.58	5.63	10.55	9.78
11715316_x_at	2.47	5.09	-6.12	0.0493	0.6587	HLA-C	major histocompatibility complex, class I, C	2.25	2.19	2.9	6.15	4.68	5.7	1.86	6.25	5.2	2.7	4.72	1.72	2.48	2.59	6.18	5.07
11725088_at	8.7	10.68	-3.94	0.0014	0.254	MYH1	myosin, heavy chain 1, skeletal muscle, adult	10.44	9.74	9.23	10.93	10.54	10.55	7.53	10.86	10.66	8.39	7.29	5.9	10.2	10.29	10.73	10.89
11731445_at	2.34	3.98	-3.1	0.3106	0.9088	ANKRD1	ankyrin repeat domain 1 (cardiac muscle)	4.64	5.7	2.29	3.87	3.33	2.71	2.31	4.19	2.55	2.28	2.44	3.64	2.02	2.06	5.28	4.68
11730384_at	2.4	4	-3.02	0.0132	0.4932	GREM2	gremlin 2, DAN family BMP antagonist	3.86	2.22	4.08	2.88	2.64	2.44	2.7	4.77	4.16	2.11	2.63	2.26	4.21	4.17	4.94	3.79
11729563_a_at	2.39	3.97	-2.99	0.0041	0.354	LRRC3B	leucine rich repeat containing 3B	4.39	2.6	2.54	5.03	3.84	2.03	2.22	3.87	2.33	2.68	2.62	1.42	3.87	2.14	1.92	3.77
11757504_a_at	3.57	5.03	-2.76	0.0002	0.1252	DDAH1	dimethylarginine dimethylaminohydrolase 1	5.17	3.84	3.09	4.65	5.32	3.66	4.28	4.94	3.42	2.79	3.63	4.5	4.86	2.57	5.01	5.3
11757112_a_at	6.85	8.3	-2.73	0.0458	0.6492	SNHG8	small nucleolar RNA host gene 8	6.73	6.83	6.19	9.15	8.62	7.9	6.7	8.33	6.57	6.62	7.64	8.61	6.35	6.44	9.12	8.66
11744311_a_at	2.27	3.68	-2.66	0.0504	0.661	PLIN1	perilipin 1	2.11	2.45	1.89	2.62	3.17	2.91	5.16	4.61	5.29	1.47	3.48	1.53	3.28	2.05	6.97	3.85
11756834_a_at	5.01	6.31	-2.45	0.0038	0.3453	PRKAG3	protein kinase, AMP-activated, gamma 3 non-catalytic subunit	6.08	4.89	5.36	6.65	6.22	5.25	3.85	6.5	6.33	4.84	5.13	4.7	5.32	5.01	6.83	5.24
11725001_at	4.32	5.6	-2.43	0.0018	0.2784	IRX3	iroquois homeobox 3	6.38	3.96	4.54	5.57	4.91	4.17	4.22	5.56	5.59	5.56	4.68	4.08	5.79	4.53	5.17	5.98
11734256_a_at	4.09	5.37	-2.42	0.0034	0.3379	PRKAG3	protein kinase, AMP-activated, gamma 3 non-catalytic subunit	5.52	4.12	3.86	6.01	5.06	4.46	3.66	5.2	5.78	3.86	4.7	4.09	4.8	4.15	6.1	4.29
11734257_at	5.75	7.02	-2.41	0.0046	0.3744	PRKAG3	protein kinase, AMP-activated, gamma 3 non-catalytic subunit	6.71	5.82	5.94	7.56	6.85	6.17	4.84	7.25	7.31	5.57	5.51	5.47	6.49	6.23	7.59	6.2
11735377_at	4.06	5.3	-2.36	0.002	0.2862	MSTN	myostatin	5.31	4.28	4.29	5.33	5.28	4.54	3.71	5.44	5.83	3.1	3.93	3.64	4.92	4.61	6.88	4.45
11745407_s_at	4.71	5.95	-2.36	0.0015	0.2581	LOC441239	uncharacterized LOC441239	6.44	4.92	5.09	6.34	6.69	4.25	4.54	5.67	5.64	5.78	5.45	3.85	6.18	3.86	5.53	4.96
11753938_a_at	5.6	6.83	-2.34	0.01	0.4673	FAM166B	family with sequence similarity 166, member B	6.89	4.85	5.76	6.42	6.57	5.46	6.58	6.78	7.57	6.1	6.4	5.11	6.95	4.42	7.39	6.08
11763207_at	4.44	5.66	-2.33	0.0429	0.644	SH3RF2	SH3 domain containing ring finger 2	5.08	5.01	4.71	6.24	5.91	4.75	4.19	5.73	5.66	4.13	4.24	3.57	5.19	5.79	6.85	4.84
11734258_a_at	5.25	6.46	-2.3	0.0029	0.3277	PRKAG3	protein kinase, AMP-activated, gamma 3 non-catalytic subunit	6.32	5.17	5.68	6.84	6.22	5.33	4.88	6.6	6.89	5.28	5.22	5.17	5.92	5.5	7.05	5.48
11741093_a_at	4.53	5.72	-2.29	2.92e-05	0.0608	GPD2	glycerol-3-phosphate dehydrogenase 2	5.68	5	4.22	6.12	5.71	4.52	4.52	5.77	5.84	4.88	4.6	4	5.41	4.45	6.59	5.15
11730465_at	4.03	5.21	-2.27	0.0079	0.4405	KCNJ2	potassium channel, inwardly rectifying subfamily J, member 2	3.87	3.99	3.68	5.34	5.11	4.49	4.59	5.16	5.31	3.84	3.92	3.66	4.86	4.43	5.55	3.57

## Sheet: ST vs S-UT at PRE
Top 20 genes with highest fold change between ST and S-UT at basal time point PRE
#%result_name=BAM Threshold 1,5 Basal
#%array_type=HG-U219
#%annotation=HG-U219.na36.annot.csv
#%comparison=Pre: ST vs S-UT
ID	Pre: ST Avg (log2)	Pre: S-UT Avg (log2)	Fold Change	P-val	FDR P-val	Gene Symbol	Description	E13R009a07.rma.chp Signal	E13R009a18.rma.chp Signal	E13R009a26.rma.chp Signal	E13R009b06.rma.chp Signal	E13R009b21.rma.chp Signal	E13R009b25.rma.chp Signal	E13R009b28.rma.chp Signal	E13R009c01.rma.chp Signal	E13R009c04.rma.chp Signal	E13R009c07.rma.chp Signal	E13R009c10.rma.chp Signal	E13R009c18.rma.chp Signal	E13R009c23.rma.chp Signal	E13R009c26.rma.chp Signal	E13R009c30.rma.chp Signal	E13R009c33.rma.chp Signal
11720489_a_at	4.6	6.53	-3.81	0.0405	0.4833	ACTC1	actin, alpha, cardiac muscle 1	4.31	10.39	6.43	5.69	3.89	5.94	5.5	8.57	4.3	6.88	4.96	8.22	3.82	4.85	3.89	3.33
11753823_a_at	2.97	4.58	-3.05	0.0749	0.5636	S100A8	S100 calcium binding protein A8	2.88	6.58	2.7	3.11	3.71	6.18	6.37	5.14	5.87	3.35	2.83	2.66	2.68	3.69	3.21	2.92
11733717_at	5.49	6.66	-2.24	0.0314	0.4505	CALML6	calmodulin-like 6	5.13	3.04	4.78	6.19	6.03	6.74	6.96	7.14	5.23	5.78	5.73	6.42	5.58	3.37	6.13	7.94
11715563_s_at	3.76	4.91	-2.22	0.226	0.7385	SCD	stearoyl-CoA desaturase (delta-9-desaturase)	3.53	4.82	3.79	4.11	2.38	6.01	8.31	4.66	6.74	3.65	3.7	4.42	3.99	3.16	5.8	6.7
11753712_x_at	10.09	11.24	-2.22	0.2425	0.7499	HBB	hemoglobin, beta	11.87	10.61	8.86	9.57	11.32	11.31	12.2	11.66	11.99	12.04	9.88	8.95	9.85	11.93	9.35	10.22
11716523_at	2.5	3.61	-2.16	0.1512	0.6728	S100A9	S100 calcium binding protein A9	2.8	5.25	2.01	2.36	2.76	4.73	5.66	4.16	4.89	2.47	2.4	2.1	2.65	3.87	2.57	2.41
11729251_at	2.48	3.59	-2.15	0.0482	0.5031	MNDA	myeloid cell nuclear differentiation antigen	1.63	5.36	2.56	1.77	3	4.48	3.74	4	4.17	2.39	2.49	2.32	2.43	2.87	3	3.56
11752633_a_at	4.47	5.55	-2.12	0.0521	0.5165	OLFM1	olfactomedin 1	4.52	4.19	4.47	4.19	5.89	5.04	5.6	5.37	4.47	2.96	4.59	5.93	4.81	4.46	4.35	6.77
11743087_at	2.62	3.7	-2.11	0.1859	0.7026	PPBP	pro-platelet basic protein	5.93	2.52	1.67	2.28	3.63	3.51	6.57	4.69	3.99	5.67	2.29	2.08	2.41	3.7	2.71	2.68
11756174_s_at	3.72	4.8	-2.11	0.1495	0.6708	SCD	stearoyl-CoA desaturase (delta-9-desaturase)	2.99	5	3.64	3.01	3.39	5.62	7.18	4.49	6.21	3.23	3.77	4.14	3.9	3.95	5.21	5.99
11750258_a_at	3.77	4.85	-2.1	0.4919	0.8701	ATXN2L	ataxin 2-like	4.65	4.72	3.6	4.79	5.01	5.04	4.69	4.88	3.81	4.79	3.82	2.93	3.7	3.56	5.1	2.33
11725925_at	5.02	6.08	-2.09	0.2164	0.7288	MYBPH	myosin binding protein H	3.69	10.98	6.31	7.35	3.23	6.81	3.96	7.51	6.3	7.54	4.95	5.89	4.44	4.73	2.74	3.75
11755866_a_at	4.06	5.11	-2.06	0.0266	0.4349	OLFM1	olfactomedin 1	4.16	3.5	3.9	3.6	5.14	5.14	4.8	5.23	4.07	3.3	4.75	5.94	4.07	4.06	4.04	6
11721900_at	3.03	4.07	-2.06	0.0432	0.4923	FCN1	ficolin (collagen/fibrinogen domain containing) 1	2.85	4.88	2.53	3.06	3.84	4.11	4.46	2.89	3.84	4.12	3.11	3.9	3.05	3.64	2.81	2.7
11740012_a_at	1.31	2.34	-2.04	0.0561	0.526	NEIL3	nei-like DNA glycosylase 3	2.44	1.37	1.12	1.24	3.06	3.26	4.04	1.89	1.79	2.75	1.3	1.11	1.39	3.11	1.18	1.55
11758680_s_at	3.58	4.59	-2.01	0.0738	0.5602	UCHL1	ubiquitin C-terminal hydrolase L1	4.25	5.54	3.36	3.68	2.92	4.68	4.33	3.05	4.59	4.5	3.03	4.72	4.09	3.2	2.58	4.68
11715757_a_at	2.8	3.77	-1.97	0.2068	0.721	RGS2	regulator of G-protein signaling 2	2.57	5.42	2.7	2.5	3.39	4.4	4.18	3.67	4.63	3.86	2.84	1.89	2.79	3.84	3.18	2.88
11729721_s_at	4.08	5.06	-1.96	0.0311	0.4488	LILRA6; LILRB2; LILRB3; LOC102725015; LOC102725029; LOC102725031; LOC102725034; LOC102725035	leukocyte immunoglobulin-like receptor, subfamily A (with TM domain), member 6; leukocyte immunoglobulin-like receptor, subfamily B (with TM and ITIM domains), member 2; leukocyte immunoglobulin-like receptor, subfamily B (with TM and ITIM domains), member 3; leukocyte immunoglobulin-like receptor subfamily B member 3	3.32	5.77	4.19	4.42	5.81	4.47	6.3	4.29	4.87	5.83	3.31	3.35	2.92	4.67	4.27	4.09
11756083_x_at	1.28	2.25	-1.96	0.0299	0.4438	HLA-DQA1; HLA-DQA2	major histocompatibility complex, class II, DQ alpha 1; major histocompatibility complex, class II, DQ alpha 2	0.86	3.07	0.79	1.19	1.26	3.14	1.28	2.88	1.92	1.23	1.2	3.2	1.9	1.2	1.53	1.78
11763796_at	1.99	2.95	-1.94	0.0038	0.2547	EPHB1	EPH receptor B1	2.22	2.73	2.15	2.11	3.36	2.97	3.21	2.46	3.06	2.01	1.92	3	1.63	1.95	1.82	2.98

## Sheet: ET vs ST at PRE
Top 20 genes with highest fold change between ET and ST at basal time point PRE
#%result_name=BAM Threshold 1,5 Basal
#%array_type=HG-U219
#%annotation=HG-U219.na36.annot.csv
#%comparison=Pre: ET vs ST
ID	Pre: ET Avg (log2)	Pre: ST Avg (log2)	Fold Change	P-val	FDR P-val	Gene Symbol	Description	E12R001b05.rma.chp Signal	E12R001c01.rma.chp Signal	E12R001e05.rma.chp Signal	E12R001h01.rma.chp Signal	E12R001j05.rma.chp Signal	E12R001m01.rma.chp Signal	E12R001o01.rma.chp Signal	E12R001q01.rma.chp Signal	E13R009a07.rma.chp Signal	E13R009a26.rma.chp Signal	E13R009b06.rma.chp Signal	E13R009c04.rma.chp Signal	E13R009c10.rma.chp Signal	E13R009c23.rma.chp Signal	E13R009c26.rma.chp Signal	E13R009c30.rma.chp Signal
11730995_a_at	6.45	9.14	-6.44	0.1476	0.4619	ACTN3	actinin, alpha 3 (gene/pseudogene)	3.9	7.99	8.72	3.31	7.77	8.28	4.9	5.63	10.04	9.2	6.3	9.46	5.08	8.96	3.39	10.15
11715316_x_at	2.47	4.94	-5.53	0.1589	0.4788	HLA-C	major histocompatibility complex, class I, C	2.19	2.9	5.7	1.86	2.7	4.72	1.72	2.59	4.85	3.05	2.38	6.02	5.21	5.27	5.57	1.93
11763550_x_at	4.09	5.94	-3.59	0.0005	0.0198	IGK; IGKC; IGKV1-5; IGKV2-24	immunoglobulin kappa locus; immunoglobulin kappa constant; immunoglobulin kappa variable 1-5; immunoglobulin kappa variable 2-24	4.93	5.71	4.2	5.06	2.57	4.45	2.8	2.26	5.96	5.74	6.8	4.9	5.51	5.09	6.91	6.72
11717732_s_at	5.66	7.35	-3.23	0.0351	0.2222	PFKFB3	6-phosphofructo-2-kinase/fructose-2,6-biphosphatase 3	6.17	6.67	5.48	5.73	5.49	6.54	5.51	5.66	4.63	7.79	6.61	7	7.99	7.45	7.19	7.44
11729130_at	3.82	5.46	-3.11	4.57e-06	0.001	ANAPC16	anaphase promoting complex subunit 16	4.43	3.73	4.44	3.48	3.74	3.3	3.39	4.5	4.76	5.42	5.24	5.52	5.74	5.82	5.17	5.69
11758231_x_at	3.09	4.7	-3.07	0.0266	0.1935	HLA-DPA1	major histocompatibility complex, class II, DP alpha 1	3.3	3.95	2.16	2.86	2.59	3.68	3.77	2.34	3.87	1.75	4.32	4.81	4.93	4.83	5.19	4.6
11757120_at	6.46	8.03	-2.97	0.0004	0.0172	EIF4A2; SNORA63	eukaryotic translation initiation factor 4A2; small nucleolar RNA, H/ACA box 63	6.07	6.61	6.26	6.22	6.22	7.58	7.42	6.96	7.63	7.68	7.53	8.66	8.65	7.66	8.89	8.2
11757112_a_at	6.85	8.41	-2.95	0.011	0.1199	SNHG8	small nucleolar RNA host gene 8	6.83	6.19	7.9	6.7	6.62	7.64	8.61	6.44	8.36	8.54	8.77	8.72	8.82	7.63	7.03	7.54
11757504_a_at	3.57	5.11	-2.9	5.25e-07	0.0002	DDAH1	dimethylarginine dimethylaminohydrolase 1	3.84	3.09	3.66	4.28	2.79	3.63	4.5	2.57	4.75	5.17	5.02	5.91	6.61	5.47	4.76	4.86
11716716_x_at	2.73	4.25	-2.86	7.24e-05	0.0056	CTSB	cathepsin B	3.43	1.95	3.25	2.23	3.79	1.76	2.79	2.68	3.67	3.96	4.28	4.12	4.52	4.84	4.11	4.62
11725574_a_at	3.6	5.12	-2.85	7.9e-08	6.5e-05	NEDD4	neural precursor cell expressed, developmentally down-regulated 4, E3 ubiquitin protein ligase	3.43	3.4	4.58	3.52	3.89	3.68	3.94	3.47	5.31	5.29	4.69	5.16	5.74	5.27	4.67	4.46
11723597_at	4.16	5.65	-2.81	5.62e-11	2.9e-07	MAP2K7	mitogen-activated protein kinase kinase 7	4	3.72	4.57	3.88	4.28	4.05	4.42	4.32	5.62	5.62	6.64	5.27	5.6	5.87	6.2	4.98
11734152_at	4.72	6.21	-2.81	5.22e-05	0.0045	ABRA	actin binding Rho activating protein	4.31	4.31	5.01	5.19	4.6	4.74	5.05	4.6	7.32	6.17	5.88	6.39	6.47	5.21	5.86	6.37
11720657_x_at	2.86	4.34	-2.8	0.806	0.9347	HLA-DRB5	major histocompatibility complex, class II, DR beta 5	6.35	2.26	2.43	3.2	2.97	7.47	2.43	5.67	3.06	5.94	2.23	5.9	2.43	5.96	6.53	2.45
11725088_at	8.7	10.17	-2.76	0.2926	0.6239	MYH1	myosin, heavy chain 1, skeletal muscle, adult	9.74	9.23	10.55	7.53	8.39	7.29	5.9	10.29	10.57	9.87	8.73	10.69	10.21	7.15	6.41	10.51
11724762_a_at	3.9	5.3	-2.64	0.0146	0.1388	DEPTOR	DEP domain containing MTOR-interacting protein	4.4	3.58	3.66	4.79	3.19	5.2	3.77	3.85	5.46	5.51	5.51	4.74	5.17	4.54	3.71	5.42
11731939_a_at	5.3	6.68	-2.6	0.0037	0.063	UCP3	uncoupling protein 3 (mitochondrial, proton carrier)	6	5.34	5.25	5.18	5.57	4.64	5.45	5.06	4.1	6.95	5.65	6.08	6.89	7.59	6.69	6.69
11723032_a_at	5.61	6.97	-2.56	0.0008	0.0268	PLP2	proteolipid protein 2 (colonic epithelium-enriched)	5.23	5.38	5.99	5.91	5.6	5.6	5.39	5.79	6.8	6.76	7.12	6.58	6.94	7.02	7.25	7.2
11726063_a_at	2.27	3.58	-2.49	0.0012	0.0336	C2orf40	chromosome 2 open reading frame 40	2.26	2.72	2.15	2.25	1.79	1.81	2.56	2.57	2.73	4.14	1.91	4.89	3.26	2.7	3.91	5.12
11715414_x_at	3.21	4.52	-2.49	0.0255	0.1892	COL3A1	collagen, type III, alpha 1	3.49	2.93	3.27	3.12	2.95	2.93	3.6	3.45	3.72	4.61	3.34	4.94	4.43	4.54	4.58	4.41
